# Supplementary material for: γ-proteobacteria eject their polar flagella under nutrient depletion, retaining flagellar motor relic structures
Source: PLoS Biol. 2019 Mar 19;17(3):e3000165. doi: 10.1371/journal.pbio.3000165 (PMC6424402; doi:10.1371/journal.pbio.3000165)
Supplement: S1 Data — (XLSX) [file pbio.3000165.s007.xlsx]

## Sheet: Fig 1A
Vibrio mean swimming speeds
Mean OD600	Mean Swimming Speed	Standard Error
0.21	19.8478	0.93095
0.436667	28.4539	1.38522
0.61	30.678	1.18797
0.826667	15.1956	1.46303
1.00667	9.97124	0.852789
1.21	9.41662	0.328765
Plesiomonas mean swimming speeds
Mean OD600	Mean Swimming Speed	Standard Error
0.226667	34.7533	0.659827
0.413333	40.8956	0.458467
0.6	40.35	0.443809
0.826667	32.4444	2.50857
1	11.7378	2.11082
1.26667	10.1671	1.19583
Salmonella mean swimming speeds
Mean OD600	Mean Swimming Speed	Standard Error
0.2	12.3667	1.14094
0.4	17.1233	1.42724
0.6	22.41	0
0.8	25.665	2.725
1	22.6167	1.26688
1.21	19.3967	2.59078
swim_speed_relative_to_low_OD
salmonella OD	relative to OD 0.2
0.2	1
0.4	1.38464
0.6	1.81213
0.8	2.07534
1	1.82884
1.2	1.56846
Vibrio	relative to OD 0.2
0.2	1
0.4	1.43361
0.6	1.54566
0.8	0.765605
1	0.502386
1.2	0.474442
Plesiomonas	relative to OD 0.2
0.2	1
0.4	1.17674
0.6	1.16104
0.8	0.933564
1	0.337745
1.2	0.292551

## Sheet: Fig 1C,D
Salmonella							Vibrio					Plesiomonas
OD600	Medians	Mean	Number of cells ×108	Absolute number of flagella	Standard deviation	Confidence	OD600	Mean	Absolute number of flagella	Standard deviation	Confidence	OD600	Mean	Mean Absolute number of flagella	Standard deviation	Confidence
0.2	1	2.36957	1	2.36957	2.61074	0.775293	0.2	4.525	4.525	2.30926	0.738538	0.2	7.61905	7.61773	2.11755	0.345174
0.4	2	2.64	1.8	4.752	2.39349	0.680222	0.4	4.05714	7.30286	1.81404	0.623146	0.4	7.41549	13.3126	2.47324	0.410312
0.6	4	4.22	3.4	14.348	2.06319	0.586351	0.6	3.80882	12.95	2.26101	0.547281	0.6	3.7047	12.5911	1.61288	0.26111
0.8	4	4.3	4.2	18.06	2.08248	0.591835	0.8	2.13158	8.95263	1.7914	0.409353	0.8	2.51333	10.556	1.60844	0.259507
1	4.5	4.3	5.2	22.36	2.37547	0.675101	1	1.59302	8.28372	1.40903	0.302096	1	1.47407	7.64152	1.23282	0.209856

## Sheet: Fig 3F
Motor (nm)	Relic (nm)
33.6685	27.4
34.4935	26.4
32.8822	26.7
29.1246	28.6
31.7711	28.4
33.0986	27.1
31.2572	25.4
30.7521	21.9
30.6869	26.1
30.3905	26.4
29.3054	24.6
31.7421	26.9
30.1155	31.8
33.4239	25.1
32.9197	31.8
36.2439	26.8
31.4791	29.5
29.3205	27.1
34.388	22.3
33.9125	24
35.1552	21.2
34.4122	27.2
32.1	32.4
31	34.1
36.4	33.7
30.4	25.6
33	33.6
30.5	31
36.8	34.4
32.2	26.9
30.4	30
35.8
37

## Sheet: Fig 4A
Motors nearest neighbours nm	Relics nearest neighbours nm	Random nearest neighbours nm
79.757	66.1563	73.3485
79.757	59.6874	130.25
92.0882	52.088	33.3766
92.3178	45.03	33.3766
61.8253	39.6253	41.8688
61.8253	39.6253	25.5539
69.85	68.3935	66.0303
66.516	58.0118	38.2099
66.1563	56.4662	25.5539
172.361	59.9435	38.2099
172.361	66.5135	73.9797
71.0277	67.4941	35.4683
59.6874	74.3523	35.4683
45.03	65.8816	73.9797
68.3935	63.9622	75.1332
62.4766	71.0262	102.611
62.4766	60.238	83.2947
63.8638	58.6846	109.932
72.6635	51.2838	77.5242
72.6635	60.0512	106.888
63.8638	56.1272	52.6308
65.4182	67.7279	73.3757
65.4182	56.1272	23.6008
74.2539	67.1294	16.1245
85.0911	54.6637	167.242
59.9435	67.1294	35.6931
74.3523	65.0464	58.8558
67.4941	35.9838	73.3757
65.8816	59.717	35.6931
66.5135	63.6497	16.1245
69.1644	68.1315	48.1041
46.8357	59.8844	65.192
46.8357	56.2719	39.3573
177.44	54.2722	67.6757
69.0739	54.2722	111.36
69.0739	60.8826	67.6757
49.1049	65.6213	65.192
49.1049	46.2853	144.693
66.8379	46.2853	38.833
50.4008	71.6853	48.3839
50.4008	57.8758	38.833
60.238	91.3793	56.7274
181.136	68.1989	106.019
65.9586	69.5795	43.0813
63.5894	55.4188	43.0813
51.2838	37.956	51
56.3808	59.9576	48.0833
56.3808	56.5932	39.8121
80.5667	55.7226	56.0892
74.3509	72.3057	21.2132
67.7279	65.872	21.2132
66.4972	62.8963	48.0833
60.0512	70.0026	91.526
67.304	52.6453	91.526
65.3181	71.9369	175.137
54.6637	76.6213	123.471
69.8562	60.5027	46.1736
65.0464	60.5027	46.1736
83.1345	56.1064	95.7079
55.7348	61.6179	65.192
35.7537	76.5658	64.3506
35.7537	3.08976	99.5038
35.9838	62.083	85.0941
55.7348	76.7502	85.0941
101.069	76.3142	99.5038
67.6239	58.191	43.6005
67.6239	46.8418	214.693
68.6449	65.1798	38.833
57.4418	46.8418	38.833
57.4418	59.8541	84.2912
65.1316	58.6117	19.2094
65.1316	58.6117	23.0217
81.0979	53.4246	65.5134
63.6497	59.8161	36.6879
67.5248	45.6321	78.7718
74.6621	54.7081	19.2094
75.4196	64.6316	23.0217
97.1715	73.8688	65.5134
97.1715	73.9241	43.0116
128.469	64.8032	73.5731
99.5334	71.9619	43.0116
89.7569	70.6313	73.5731
62.7572	58.1587	158.269
71.6108	42.9254	158.269
62.7572	56.7165	46.8188
67.3014	74.8315	63.0714
75.6633	91.3709	73.9256
67.3014	53.3687	48.0104
101.91	48.765	48.0104
76.3272	48.765	79.6241
67.8498	78.1054	79.6241
59.8844	49.9877	46.8188
214.263	56.2903	77.7817
55.8165	62.5039	53.9073
55.134	52.424	42.1545
66.062	56.2903	42.1545
55.134	54.1655	21.095
73.1431	44.4902	122.931
171.837	63.5254	21.095
171.837	59.0452	46.0109
76.534	72.215	81.0987
60.8826	47.6564	34.4819
65.6213	63.4376	34.4819
67.2404	57.6844	59.2284
86.3767	66.2333	71.0282
70.1803	64.2094	88.5438
63.7583	63.574	71.0282
63.7583	68.1066	59.2284
58.4075	53.4252	117.341
58.4075	56.9992	37.0135
63.8694	52.7314	37.0135
84.996	53.4252	61.9839
57.7609	43.0649	61.9839
54.4898	62.4304	74.4648
54.4898		119.775
56.1237		38.833
59.4199		47.8539
80.2146		37.0135
81.0722		24.5967
68.9694		47.8539
72.8987		51.0392
43.3764		24.5967
43.3764		91.1811
57.4415		34.1321
57.4415		101.597
70.7863		34.1321
57.8758		54.1479
78.7832		118.258
78.4678		54.1479
78.4678		78.8923
68.1989		34
56.8818		34
37.956		30.2324
62.8227		30.2324
69.5795		70.0928
56.5932		130.035
52.9067		43.9659
68.6407		43.9659
52.9067		70.0928
62.8963		48.3735
60.3572		107.703
55.7226		48.3735
65.244		107.703
60.3572		46.0435
136.281		46.0435
86.4364		106.888
71.0147		126.905
71.0147		48.1041
52.6453		132.97
83.3144		60.0333
82.6215		48.1041
71.624		115.767
71.624		69.6419
75.4346		80.0062
75.7072		36
79.2541		18.4391
79.2541		29.0172
75.8146		43.8292
63.6159		82.4924
63.6159		36
52.4056		18.4391
52.4056		43.8292
69.1338		84.2021
71.5285		38.2884
71.5285		129.553
64.1528		24.0832
3.08976		51.923
61.6179		23.7065
57.4498		24.0832
56.1064		51.923
75.5062		38.833
71.3003		23.7065
71.3003		86.885
75.5062		73.6003
66.7676		29.0689
66.7676		32.6497
69.5241		32.6497
83.8832		100.285
65.8521		73.6003
71.0026		29.0689
50.8637		42.9535
68.8556		62.2013
65.8521		62.2013
50.8637		30.4138
63.8435		30.4138
66.1486		129.248
64.0805		85.7263
64.0805		18.4391
63.2859		56.7186
63.2859		73.0068
85.2887		35
61.3291		18.4391
71.1056		35
69.1421		73.0068
58.191		77.2787
83.137		22.8254
60.7135		102.825
73.5031		97.1854
73.5031		22.8254
58.7126		97.1854
59.5925		115.213
60.7135		48.0208
59.5925		83.3547
69.8234		65.8027
55.6892		44.8219
69.8234		93.6483
55.6892		44.8219
61.2585		31.9531
89.5281		31.9531
61.2585		53.0094
66.0235		79.0063
61.3507		53.1507
61.3507		78.8162
73.0531		78.8162
79.407		79.0063
53.5639		88.7694
53.5639		53.0094
76.554		48.1041
76.554		151.268
57.0908		50.2494
59.3172		153.388
68.6993		48.1041
63.955		66.5282
64.9784		50.2494
66.3622		75.5844
64.9784		111.018
53.4246		34.8281
76.5777		35.3553
65.5941		90.9725
65.5941		15
86.6996		15
77.8808		56.5685
55.5297		75.1332
55.5297		34.8281
68.4901		30.2655
61.2581		250.072
61.9986		37.4833
66.4951		28.4605
69.8031		16.6433
69.0359		16.6433
66.4951		66.6108
59.8161		6.08276
69.0359		67.0298
81.2494		6.08276
72.9795		38.3275
70.4859		77.1038
60.6863		77.1622
60.6863		78.7464
71.3638		66.6108
57.8719		59.0339
45.6321		77.1038
54.8672		59.0339
54.7081		79.6492
58.214		50.9902
58.214		50.9902
71.3689		69.6419
64.4478		27.6586
58.25		27.6586
58.25		57.2713
58.9087		72.7324
59.0141		93.1933
67.3781		56.3205
67.3781		167.26
91.1252		93.1933
85.2191		107.229
56.5853		55.1543
67.5735		78.1025
56.5853		55.1543
62.7501		78.1025
77.8488		48.1041
62.7501		151.268
84.1909		50.2494
72.1057		153.388
67.1218		48.1041
64.6316		66.5282
75.0675		50.2494
75.1223		57.2189
67.4158		103.315
67.4158		60.075
64.8032		9.05539
70.6565		45.8803
65.5897		78.4474
63.719		57.2189
63.719		9.05539
74.5179		72.45
75.6917		15.8114
80.2973		56.3205
73.6749		29.0689
74.5179		15.8114
83.0321		29.0689
62.8803		92.3147
61.1487		76.3806
61.1487		45.2548
73.6974		76.3806
54.375		45.2548
73.0961		42.0595
54.375		23.0217
58.1587		23.0217
73.8062		132.774
94.262		81.2219
67.7518		28.0713
62.9672		28.0713
62.9672		105.342
56.7165		12.6491
42.9254		105.342
72.0386		109.041
76.3268		12.6491
72.0386		57.9396
98.1228		51.614
70.4595		42.0476
60.2048		78.4474
67.8257		90.2552
77.4837		51.614
60.2048		58.3095
68.9479		99.0404
68.9479		140.456
89.5502		90.2552
72.8253		42.0476
72.8253		48.2597
55.4147		94.0053
52.424		45.6946
49.9877		36.2491
62.5039		75.9605
70.9006		33.121
85.3677		45.6946
55.1974		83.2406
55.1974		33.121
58.8176		25.9615
71.8018		137.615
67.3376		25.9615
69.276		41.7253
72.8722		18.6815
75.2124		41.7253
66.3945		18.6815
54.1655		38.4838
58.9972		38.0526
58.9972		40.1123
44.4902		45.1221
59.0452		63.1585
63.5254		40.1123
65.3117		119.507
97.9361		90.934
72.215		79.2275
73.1823		44.2832
61.6927		44.2832
63.4219		24.4131
62.2815		24.4131
50.012		51.9711
47.6564		208.614
56.6579		70.406
55.851		70.406
50.012		72.1734
73.8507		107.168
73.8507		57.0088
63.4376		57.0088
59.0651		55.4437
59.0651		55.4437
77.6659		43.8634
77.6659		43.8634
63.9154		17.2047
95.9905		17.2047
61.6087		28.2843
61.6087		32.7567
82.8123		28.2843
64.7228		56.3205
57.6844		3.16228
72.4048		88.5494
72.4048		32.7567
67.05		3.16228
92.4521		125.936
66.2333		125.936
68.897		42.107
49.435		99.8499
54.0739		111.759
78.2808		52.345
54.0739		118.596
49.435		52.345
64.2094		42.107
65.763		35.6931
65.763		35.6931
65.0761		45.2769
59.1248		106.405
59.1248		45.2769
63.574		47.4236
121.861		61.8142
68.1066		71.4213
80.3218		113.252
67.0797		56.1427
67.0797		99.905
67.7325		102.903
73.1971		85.1469
51.3433		61.8142
51.3433		52.2015
62.1346		52.2015
86.6723		56.1427
95.0472		103.586
86.6723		85
94.4816		85
88.1271		85.4927
88.1271		19.4165
64.8686		19.4165
64.8686		59.6657
89.5644		17.4642
68.7898		56.6392
71.0984		17.4642
71.0984		56.6392
52.7314		28.8617
53.498		39.2046
157.824		28.8617
61.6134		79.0759
75.044		89.1852
65.7411		131.461
65.7411		38.0789
65.2813		138.221
43.0649		39.2046
70.1803		53
63.7583		124.258
63.7583		89.1852
58.4075		4
58.4075		22.3607
63.8694		40.1123
		64.8845
		4
		64.8845
		40.1123
		42.0476
		57.2713
		54.4518
		99.4032
		57.2713
		54.4518
		58.0517
		49.0918
		50.2195
		46.0109
		62.6817
		46.0109
		49.0918
		57.2451
		77.8332
		45.1774
		45.1774
		114.935
		21.1896
		26.1725
		10.2956
		21.1896
		116.108
		29.0689
		10.2956
		35
		26.1725
		150.602
		59.6825
		48.2701
		70.859
		79.6492
		48.2701
		68.4105
		104.848
		71.5891
		68.4105
		36.6879
		43.4166
		36.6879
		43.4166
		65.192
		63.6946
		133.36
		58.8982
		58.8982
		77.1557
		77.1557
		63.6946
		116.362
		94.8736
		131.7
		72.2496
		94.8736
		72.2496
		87
		47.0744
		90.5207
		128.133
		47.0744
		87
		64.1405
		69.0507
		107.564
		67.6757
		64.1405
		69.0507
		67.6757
		103.846
		40
		43.8292
		40
		50.2892
		50.2892
		43.8292
		54.5711
		32.0624
		32.0624
		44.1022
		54.5711
		64.846
		67.2681
		30.0167
		30.0167
		48.1041
		94.0213
		52.3927
		22.2036
		39.2173
		22.2036
		50.0899
		39.2173
		31.4006
		135.636
		123.309
		10.6301
		10.6301
		104.139
		165.895
		135.636
		56.0357
		35.5106
		35.5106
		81.6088
		100.245
		86.0233
		74.7329
		74.7329
		101.637
		34.5254
		38.3275
		10.198
		39.3192
		10.198
		75.6637
		34.5254

## Sheet: Fig 4B
tomogram_name	number of structures	mean nearest neighbour nm	height in nm	width in nm	area in nm	Area + c-ring	Clark Evans		random1_mean_nearset_neighbour nm	random1_clark_evans	random2_mean_nearset_neighbour nm	random2_clark_evans	random3_mean_nearset_neighbour nm	random3_clark_evans	random4_mean_nearset_neighbour nm	random4_clark_evans	random5_mean_nearset_neighbour nm	random5_clark_evans	random_clark_evans_combined
Plesiomonas_Stack11_SIRT.rec	6	65.703	204.549	70.5519	11334.4	24101.1	2.07335		32.7784	1.03437	29.898	0.943474	31.8325	1.00452	27.1397	0.683316	19.2951	0.485807	1.03437
Plesiomonas_Stack13_SIRT.rec	12	55.5216	307.559	187.001	45171.1	66555.9	1.49104		38.1497	1.02451	28.3773	0.762077	40.9461	1.09961	37.7982	0.885022	47.1927	1.10499	1.02451
Plesiomonas_Stack14_SIRT.rec	6	66.654	196.597	82.2271	12696.5	25609.4	2.04048		21.9494	0.671938	54.9213	1.68131	38.9439	1.19219	56.3711	1.38967	52.1425	1.28543	0.671938
Plesiomonas_Stack15_SIRT.rec	6	68.6738	174.879	118.343	16254.4	29732.7	1.9511		38.7822	1.10185	29.1443	0.828024	44.0959	1.25282	37.6817	0.879165	35.4496	0.827087	1.10185
Plesiomonas_Stack20_SIRT.rec	8	68.8905	245.887	140.37	27108.2	44239.9	1.85279		40.2422	1.0823	35.2787	0.948813	42.1309	1.1331	24.1212	0.549482	35.8421	0.816484	1.0823
Plesiomonas_Stack21_SIRT.rec	6	79.5921	319.057	81.8403	20508.1	38214.8	1.99462		40.3911	1.01222	4	0.100242	16	0.400968	20	0.413584	83	1.71638	1.01222
Plesiomonas_Stack22_SIRT.rec	4	59.3739	112.909	69.2392	6140.03	15256.5	1.92278		30.6297	0.991919	38.1734	1.23621	29.4806	0.954706	50.7407	1.25996	57.3715	1.42461	0.991919
Plesiomonas_Stack23_SIRT.rec	6	78.5851	325.182	60.8698	15546	32669.7	2.12997		49.7522	1.34848	32.4012	0.878202	46.8385	1.26951	20.5552	0.449945	33.9179	0.742448	1.34848
Plesiomonas_Stack24_SIRT.rec	5	58.4401	185.945	49.9405	7293.34	18520	1.92046		31.1539	1.02378	49.5809	1.62933	42.7084	1.40349	47.8121	1.21472	26.1966	0.665553	1.02378
Plesiomonas_Stack25_SIRT.rec	11	64.1244	334.882	174.821	45980.7	67960.2	1.63163		42.07	1.07046	51.926	1.32125	42.8806	1.09109	54.8353	1.21612	58.0345	1.28707	1.07046
Plesiomonas_Stack26_SIRT.rec	10	66.2466	307.911	123.595	29889.3	48797.9	1.89668		33.743	0.966079	33.8246	0.968415	29.2231	0.836674	33.9739	0.825714	33.8357	0.822356	0.966079
Plesiomonas_Stack27_SIRT.rec	10	55.3631	582.798	129.876	59448	89398.1	1.17108		59.2581	1.25347	60.1332	1.27198	29.0172	0.613793	62.0081	1.14364	70.0286	1.29157	1.25347
Plesiomonas_Stack28_SIRT.rec	5	63.0605	237.01	71.3316	13278.2	27350.2	1.70527		20.9424	0.56632	37.937	1.02588	38.4075	1.0386	54.2403	1.18073	44.2807	0.963929	0.56632
Plesiomonas_Stack30_SIRT.rec	6	71.3425	182.244	118.311	16934.3	30700.6	1.99471		35.2363	0.985197	34.5564	0.966186	41.3779	1.15691	33.4438	0.769799	20.1248	0.463226	0.985197
Plesiomonas_Stack35_SIRT.rec	7	83.689	414.39	90.419	29427.8	51215.1	1.95681		41.9755	0.981467	46.2502	1.08142	27.6744	0.647081	30.7373	0.603841	20.6307	0.405294	0.981467
Plesiomonas_Stack5_1_SIRT.rec	4	78.4197	154.06	91.7676	11103.8	22720.9	2.081		48.5156	1.28745	19.4558	0.516294	39.4614	1.04718	27.2621	0.578653	30.2668	0.642431	1.28745
Plesiomonas_Stack5_SIRT.rec	9	78.023	543.618	99.8304	42623.3	69854.9	1.77123		53.2372	1.20856	36.1123	0.819799	49.6269	1.1266	17.3799	0.336973	33.7855	0.655057	1.20856
Plesiomonas_Stack6_SIRT.rec	4	62.6686	139.155	53.6967	5868.6	15405.3	2.01964		39.7476	1.28096	46.2868	1.4917	25.8336	0.832548	47.6431	1.17176	44.3885	1.09172	1.28096
Plesiomonas_Stack8_SIRT.rec	9	64.2779	291.273	135.164	30920.9	49630.6	1.73116		23.0121	0.619773	7.33333	0.197505	13.0912	0.352578	21	0.481838	29.367	0.673817	0.619773
Plesiomonas_Stack9_SIRT.rec	6	63.3672	185.325	89.2215	12986.5	25731.4	1.93525		33.3272	1.01782	41.9047	1.27978	26.3464	0.804628	35.2085	0.868179	36.6587	0.903939	1.01782
Plesiomonas_Stack_01_SIRT.rec	8	65.21	236.02	119.653	22180.1	38110.8	1.88958		34.9712	1.01336	33.4023	0.967892	39.703	1.15047	50.5611	1.22485	75.2643	1.82329	1.01336
Plesiomonas_Stack_100_SIRT.rec	7	60.9458	235.137	79.0102	14591.3	28891.3	1.89731		23.6554	0.73642	47.7357	1.48607	45.376	1.41261	32.303	0.815457	30.2829	0.764461	0.73642
Plesiomonas_Stack_101_SIRT.rec	4	69.8139	203.56	41.8749	6694.77	18296.5	2.06452		23.8604	0.705594	64.9536	1.92079	50.4136	1.49082	63.3064	1.43645	37.5691	0.852459	0.705594
Plesiomonas_Stack_102_SIRT.rec	5	74.7816	206.98	76.4197	12422.9	25515.5	2.09367		32.735	0.916485	32.0772	0.898068	31.9711	0.895099	38.69	0.870064	38.8217	0.873027	0.916485
Plesiomonas_Stack_103_SIRT.rec	7	56.0104	278.427	80.039	17502.6	33543.1	1.61825		31.4698	0.909225	42.5186	1.22845	26.7977	0.77424	40.3526	0.954423	25.9319	0.613343	0.909225
Plesiomonas_Stack_105_SIRT.rec	12	61.6142	316.058	130.377	32363.7	51858.7	1.87452		39.3784	1.19803	22.4898	0.684218	56.9151	1.73156	35.4877	0.920975	37.0829	0.962373	1.19803
Plesiomonas_Stack_107_SIRT.rec	5	68.5744	239.995	70.7731	13340.1	27507.4	1.84906		49.5624	1.33642	10	0.269643	59	1.5909	86.0058	1.86699	87.0057	1.88869	1.33642
Plesiomonas_Stack_40_SIRT.rec	7	75.3374	233.106	171.941	31479.1	49348.7	1.79453		42.4305	1.01069	57.0523	1.35898	31.2372	0.74407	37.3922	0.762166	34.1824	0.69674	1.01069
Plesiomonas_Stack_41_SIRT.rec	11	65.5573	245.593	161.507	31152.9	49103.2	1.96242		35.5525	1.06425	30.9788	0.927334	30.4374	0.911126	19.5735	0.500793	20.7208	0.530147	1.06425
Plesiomonas_Stack_57_SIRT.rec	9	49.1016	187.299	133.809	19683.9	34257.3	1.59173		34.9384	1.1326	53.8409	1.74537	36.8526	1.19466	32.7372	0.882557	34.354	0.926142	1.1326
Plesiomonas_Stack_58_SIRT.rec	4	73.7567	167.559	66.9245	8807.32	19979	2.08725		34.8517	0.986275	27.7299	0.784731	41.9898	1.18828	16.106	0.357922	21.5989	0.47999	0.986275
Plesiomonas_Stack_59_SIRT.rec	4	72.081	165.654	59.276	7712.08	18508.6	2.11931		34.6205	1.0179	39.3049	1.15563	25.7189	0.756182	22.6452	0.517711	25.2135	0.576427	1.0179
Plesiomonas_Stack_60_SIRT.rec	8	62.7025	226.003	104.656	18576.6	33525	1.9372		31.902	0.985617	36.9294	1.14094	22.6452	0.699627	50.2512	1.28265	40.0552	1.0224	0.985617
Plesiomonas_Stack_61_SIRT.rec	7	69.3208	250.85	104.76	20639.6	36567.8	1.9182		32.0013	0.885516	35.5165	0.982787	53.9111	1.49179	50.4266	1.15924	49.8355	1.14565	0.885516
Plesiomonas_Stack_62_SIRT.rec	6	66.0286	202.531	83.2504	13242.5	26428.6	1.98976		27.9749	0.843019	32.3012	0.97339	37.2734	1.12323	32.3398	0.786871	29.2219	0.711007	0.843019
Plesiomonas_Stack_63_SIRT.rec	11	62.8769	319.81	161.785	40636.8	61512.5	1.68165		38.9623	1.04205	35.5058	0.949608	40.2956	1.07771	31.6835	0.733556	24.4708	0.566563	1.04205
Plesiomonas_Stack_65_SIRT.rec	4	63.0585	145.11	55.921	6373.28	16231.3	1.97983		45.981	1.44365	34.2656	1.07583	42.9428	1.34826	29.9045	0.72071	41.6749	1.00438	1.44365
Plesiomonas_Stack_67_SIRT.rec	4	65.7596	137.736	75.316	8147.49	18477.5	1.93507		46.4575	1.36708	31.6819	0.932287	44.9187	1.3218	28.0084	0.644792	50.2614	1.15709	1.36708
Plesiomonas_Stack_68_SIRT.rec	12	64.1225	410.412	146.437	47202	71032.9	1.66687		39.9167	1.03764	34.4325	0.895075	38.1155	0.990814	35.2389	0.795941	34.7519	0.784941	1.03764
Plesiomonas_Stack_69_SIRT.rec	8	64.1743	225.111	131.385	23229.2	39192.2	1.83373		24.548	0.701442	32.5036	0.928767	59.0894	1.68843	27.637	0.662809	24.4233	0.585736	0.701442
Plesiomonas_Stack_70_SIRT.rec	7	67.091	200.132	124.544	19576.2	34289.6	1.91718		19.7491	0.564344	39.1257	1.11804	23.8743	0.682225	35.316	0.838385	35.8619	0.851344	0.564344
Plesiomonas_Stack_71_SIRT.rec	7	66.1021	223.082	100.83	17666.2	32349.7	1.94473		45.3187	1.33328	48.6145	1.43024	33.6139	0.988924	44.5355	1.0788	47.1872	1.14303	1.33328
Plesiomonas_Stack_72_SIRT.rec	6	69.9102	276.591	77.1934	16769	32625.6	1.89612		48.5858	1.31776	41.2719	1.11939	36.1246	0.979781	31.4539	0.69626	35.5832	0.787665	1.31776
Plesiomonas_Stack_73_SIRT.rec	10	56.8388	228.944	130.853	23529	39621.7	1.80596		27.7933	0.883086	44.7232	1.42101	38.4581	1.22194	53.1645	1.41867	38.2823	1.02155	0.883086
Plesiomonas_Stack_74_SIRT.rec	7	66.0744	241.128	114.48	21680.3	37608.5	1.80289		37.2998	1.01775	25.0695	0.68404	23.3978	0.638427	15.1341	0.344546	32.7317	0.745175	1.01775
Plesiomonas_Stack_75_SIRT.rec	7	67.3674	238.14	131.05	24510.8	40972.3	1.7611		40.4495	1.05742	31.8559	0.832768	35.3048	0.922926	38.7993	0.853706	49.1825	1.08217	1.05742
Plesiomonas_Stack_76_SIRT.rec	8	72.4396	305.175	118.911	28501	47118.3	1.8878		28.2704	0.736736	27.4362	0.714996	20.6135	0.537194	30.0709	0.663187	39.3949	0.86882	0.736736
Plesiomonas_Stack_78_SIRT.rec	8	68.6502	227.488	138.517	24748.6	41085	1.91591		36.0182	1.00521	33.1446	0.925009	38.4695	1.07362	40.1663	0.944743	19.675	0.46277	1.00521
Plesiomonas_Stack_79_SIRT.rec	7	72.6535	229.96	135.863	24538.2	40867.5	1.90172		35.2739	0.923301	34.5774	0.905071	24.8537	0.65055	33.4147	0.736603	17.8157	0.392735	0.923301
Plesiomonas_Stack_80_SIRT.rec	4	67.3753	154.578	57.612	6994.39	17290.6	2.04954		31.3338	0.953165	32.5025	0.988717	40.0541	1.21844	34.3398	0.806961	27.2346	0.639994	0.953165
Plesiomonas_Stack_81_SIRT.rec	9	68.1667	357.029	111.428	31245.6	51605.4	1.80043		35.9538	0.949617	28	0.73954	33	0.871601	9	0.201607	8	0.179206	0.949617
Plesiomonas_Stack_83_SIRT.rec	8	58.7567	214.383	125.667	21159.3	36476.5	1.74031		31.8259	0.942645	35.0478	1.03808	45.4777	1.347	35.0677	0.86678	42.2348	1.04393	0.942645
Plesiomonas_Stack_84_SIRT.rec	5	82.3743	174.793	147.636	20267.8	34893	1.97214		33.061	0.79152	44.83	1.07328	31.7251	0.759536	41.9284	0.836787	34.2496	0.683538	0.79152
Plesiomonas_Stack_89_SIRT.rec	6	64.6598	242.098	86.3568	16420.2	31282.1	1.79098		36.3872	1.00788	26.8698	0.744256	34.0445	0.942984	23.1278	0.523737	32.0367	0.725483	1.00788
Plesiomonas_Stack_90_SIRT.rec	11	59.0861	362.483	138.253	39359.6	60987	1.58706		33.4583	0.898693	53.9499	1.4491	54.5727	1.46583	35.3129	0.817059	24.2054	0.560058	0.898693
Plesiomonas_Stack_91_SIRT.rec	8	67.306	207.914	145.213	23712.5	39543.3	1.91466		23.8805	0.679331	33.7045	0.958796	33.4805	0.952424	30.4483	0.728662	44.372	1.06187	0.679331
Plesiomonas_Stack_92_SIRT.rec	8	57.3891	240.892	107.63	20363.2	36013.1	1.7107		40.4009	1.2043	39.9321	1.19033	29.6678	0.884363	30.6004	0.757692	29.7422	0.736443	1.2043
Plesiomonas_Stack_93_SIRT.rec	5	62.3895	207.335	80.3594	13085.8	26347	1.71894		42.2875	1.1651	46.7272	1.28741	35.844	0.987565	39.497	0.87748	26.5122	0.589007	1.1651
Plesiomonas_Stack_96_SIRT.rec	9	55.2918	234.345	113.36	20864.3	36482.1	1.73689		25.8135	0.810883	52.534	1.65026	45.0071	1.41381	46.7948	1.22379	68.0154	1.77876	0.810883
Plesiomonas_Stack_97_SIRT.rec	9	68.3223	267.92	122.926	25866.6	43178.6	1.97278		34.4455	0.994603	31.002	0.895172	37.6801	1.088	18.1774	0.442476	40.4153	0.983794	0.994603
Plesiomonas_Stack_98_SIRT.rec	7	69.2047	213.262	150.102	25141.3	41374.1	1.80032		50.7812	1.32105	54.453	1.41657	30.7939	0.801087	21.589	0.474167	41.5426	0.912415	1.32105
Plesiomonas_Stack_99_SIRT.rec	6	73.1469	221.274	129.864	22568.7	38321.3	1.83055		45.8684	1.14789	32.8976	0.823283	48.4369	1.21216	50.0471	1.04938	24.9592	0.523343	1.14789
Plesiomonas_Stack_95_SIRT.rec	6	59.3169	131.416	91.3444	9428.02	20139.3	2.04768		31.2865	1.08004	41.1364	1.42007	49.8648	1.72138	24.324	0.664362	36.8008	1.00514	1.08004
Plesiomonas_Stack_77_SIRT.rec	7	63.6293	226.261	121.404	21574.1	37190.4	1.74591		45.6065	1.25138	60.5953	1.66266	59.9603	1.64523	55.569	1.27313	61.8419	1.41685	1.25138
Plesiomonas_Stack2_SIRT.rec	6	70.0736	181.212	121.448	17284.9	31133.9	1.94555		46.5246	1.29173	40.5286	1.12525	43.5865	1.21016	43.1557	0.987877	38.3719	0.87837	1.29173
Plesiomonas_Stack4_SIRT.rec	8	75.4731	376.573	148.274	43853.4	66427.6	1.65651		50.4696	1.10772	57.1119	1.25351	36.2072	0.794686	38.0804	0.724419	41.5945	0.791269	1.10772
Plesiomonas_Stack3_SIRT.rec	8	76.1828	273.499	129.814	27884.7	45686.3	2.01623		39.6318	1.04888	36.3614	0.962327	38.7142	1.0246	17.2529	0.386773	42.3134	0.948572	1.04888
Plesiomonas_Stack_53_SIRT.rec	9	68.9182	345.217	167.864	45513.5	67625.6	1.59012		58.4137	1.34775	26.0179	0.600299	36.0575	0.831938	31.6261	0.635228	33.8648	0.680194	1.34775
Plesiomonas_Stack_82_SIRT.rec	6	57.831	168.876	105.484	13990.9	26728.5	1.73292		17.9426	0.537656	56.5144	1.69347	17.4747	0.523635	39.3581	0.958541	57.8382	1.40861	0.537656
Plesiomonas_Stack9.rec	6	63.3672	185.325	89.2215	12986.5	25731.4	1.93525		37.7987	1.15438	15.1825	0.46368	29.9423	0.914447	23.5759	0.581339	35.2609	0.86947	1.15438
																			1.18836
																			0.943474
																			0.762077
																			1.68131
																			0.828024
																			0.948813
																			0.100242
																			1.23621
																			0.878202
																			1.62933
																			1.32125
																			0.968415
																			1.27198
																			1.02588
																			0.966186
																			1.08142
																			0.516294
																			0.819799
																			1.4917
																			0.197505
																			1.27978
																			0.967892
																			1.48607
																			1.92079
																			0.898068
																			1.22845
																			0.905713
																			0.684218
																			0.885241
																			0.269643
																			1.35898
																			0.927334
																			1.74537
																			0.784731
																			1.15563
																			1.14094
																			0.982787
																			0.97339
																			0.949608
																			1.07583
																			1.14139
																			0.932287
																			0.895075
																			0.928767
																			1.11804
																			1.43024
																			1.11939
																			1.42101
																			0.68404
																			0.832768
																			0.714996
																			0.925009
																			0.905071
																			0.988717
																			0.73954
																			1.03808
																			1.07328
																			1.44981
																			0.744256
																			1.4491
																			0.958796
																			1.19033
																			1.28741
																			1.07045
																			1.65026
																			0.895172
																			1.41657
																			0.823283
																			1.42007
																			1.66266
																			0.860654
																			1.12525
																			1.25351
																			0.962327
																			0.600299
																			1.69347
																			0.46368
																			1.42474
																			1.00452
																			1.09961
																			1.19219
																			1.25282
																			1.1331
																			0.400968
																			0.954706
																			1.26951
																			1.40349
																			1.09109
																			0.836674
																			0.613793
																			1.0386
																			1.15691
																			0.647081
																			1.04718
																			1.1266
																			0.832548
																			0.352578
																			0.804628
																			1.15047
																			1.41261
																			1.49082
																			0.895099
																			0.77424
																			1.50948
																			1.73156
																			0.884058
																			1.5909
																			0.74407
																			0.911126
																			1.19466
																			1.18828
																			0.756182
																			0.699627
																			1.49179
																			1.12323
																			1.07771
																			1.34826
																			1.0047
																			1.3218
																			0.990814
																			1.68843
																			0.682225
																			0.988924
																			0.979781
																			1.22194
																			0.638427
																			0.922926
																			0.537194
																			1.07362
																			0.65055
																			1.21844
																			0.871601
																			1.347
																			0.759536
																			0.790453
																			0.942984
																			1.46583
																			0.952424
																			0.884363
																			0.987565
																			1.42744
																			1.41381
																			1.088
																			0.801087
																			1.21216
																			1.72138
																			1.64523
																			0.930596
																			1.21016
																			0.794686
																			1.0246
																			0.831938
																			0.523635
																			0.914447
																			1.01969
																			0.683316
																			0.885022
																			1.38967
																			0.879165
																			0.549482
																			0.413584
																			1.25996
																			0.449945
																			1.21472
																			1.21612
																			0.825714
																			1.14364
																			1.18073
																			0.769799
																			0.603841
																			0.578653
																			0.336973
																			1.17176
																			0.481838
																			0.868179
																			1.22485
																			0.815457
																			1.43645
																			0.870064
																			0.954423
																			0.841258
																			0.920975
																			0.381928
																			1.86699
																			0.762166
																			0.500793
																			0.882557
																			0.357922
																			0.517711
																			1.28265
																			1.15924
																			0.786871
																			0.733556
																			0.72071
																			1.05333
																			0.644792
																			0.795941
																			0.662809
																			0.838385
																			1.0788
																			0.69626
																			1.41867
																			0.344546
																			0.853706
																			0.663187
																			0.944743
																			0.736603
																			0.806961
																			0.201607
																			0.86678
																			0.836787
																			1.06013
																			0.523737
																			0.817059
																			0.728662
																			0.757692
																			0.87748
																			0.926284
																			1.22379
																			0.442476
																			0.474167
																			1.04938
																			0.664362
																			1.27313
																			0.556174
																			0.987877
																			0.724419
																			0.386773
																			0.635228
																			0.958541
																			0.581339
																			1.41261
																			0.485807
																			1.10499
																			1.28543
																			0.827087
																			0.816484
																			1.71638
																			1.42461
																			0.742448
																			0.665553
																			1.28707
																			0.822356
																			1.29157
																			0.963929
																			0.463226
																			0.405294
																			0.642431
																			0.655057
																			1.09172
																			0.673817
																			0.903939
																			1.82329
																			0.764461
																			0.852459
																			0.873027
																			0.613343
																			1.25821
																			0.962373
																			0.651774
																			1.88869
																			0.69674
																			0.530147
																			0.926142
																			0.47999
																			0.576427
																			1.0224
																			1.14565
																			0.711007
																			0.566563
																			1.00438
																			1.17148
																			1.15709
																			0.784941
																			0.585736
																			0.851344
																			1.14303
																			0.787665
																			1.02155
																			0.745175
																			1.08217
																			0.86882
																			0.46277
																			0.392735
																			0.639994
																			0.179206
																			1.04393
																			0.683538
																			0.941355
																			0.725483
																			0.560058
																			1.06187
																			0.736443
																			0.589007
																			0.666103
																			1.77876
																			0.983794
																			0.912415
																			0.523343
																			1.00514
																			1.41685
																			1.01626
																			0.87837
																			0.791269
																			0.948572
																			0.680194
																			1.40861
																			0.86947
																			0.974994

## Sheet: Fig 5A
Combination of triplcates:
before	kept at 0.2	grown to 1
9	6	1
9	7	1
8	7	2
5	3	2
1	5	5
3	7	2
5	5	3
6	8	2
4	8	2
3	4	5
9	4	0
5	8	4
7	5	0
6	7	1
6	4	0
7	4	1
3	2	2
8	3	3
8	3	1
6	4	0
7	5	3
6	4	1
4	5	0
5	3	0
1	3	6
0	0	0
3	7	3
4	4	2
4	5	1
4	7	2
2	6	0
3	4	1
2	3	2
4	3	0
2	9	0
6	3	5
9	4	2
1	4	1
9	5	4
8	6	2
7	5	4
6	9	1
7	4	1
1	4	1
3	5	0
9	8	0
5	3	2
0	5	2
5	5	0
4	9	1
7	3	3
5	7	1
0	7	0
1	8	5
6	7	0
4	4	3
9	5	5
3	5	2
5	4	1
2	3	3
0	9	0
6	5	1
1	7	3
5	8	1
7	7	0
6	6	0
6	8	5
3	6	3
4		4
5		0
5		3
6		1
7		2
3		1
7		2
		0
		1
		0
		0
		0
		2
		0
		0
		1
		3
		3
		0
		2
		4
		2
		2
		7
		0
		1
		3
		5
		3
		5
		2
		0
		5
		2
		0
		0
		2
		1

## Sheet: Fig 5B
Combination of triplicates:
0.2	fresh	spent
5	7	7
6	5	0
6	5	1
6	9	0
7	10	2
4	9	2
5	8	1
7	6	0
9	3	3
6	5	0
7	2	0
7	3	0
3	7	1
6	9	0
8	9	0
7	6	2
5	9	3
8	6	0
8	5	1
12	8	3
3	6	3
6	5	1
8	5	2
4	8	2
6	13	1
5	5	3
4	10	0
9	4	1
4	7	0
11	4	0
6	6	1
5	6	1
6	7	0
10	5	0
8	8	4
8	6	0
4	3	0
5	6	2
7	6	0
8	2	2
2	5	0
8	9	0
7	7	2
5	6	3
4	7	2
8	7	0
9	4	2
10	4	0
5	9	1
6	7	1
12	5	0
5	11	2
6	5	3
5	2	4
6	6	0
9	8	0
8	0	1
9	5	1
12	4	0
0	3	0
8	8	1
4	13	1
12	6	2
11	6	0
5	11	0
7	6	0
8	6	0
7	11	3
9	4	0
8	0	1
7	0	0
8	4	0
7	8	0
5	7	3
6	4	0
7	7	4
5	1	0
9	8	2
5	8	5
6	9	1
4	12	0
7	8	1
4	4	6
5	9	2
0	8	0
7	2	0
12	1	0
6	8	2
7	4	1
9	6	0

## Sheet: Fig 5C
Combination of triplicates
before	salmonella spent
11	1
5	3
6	0
7	0
7	1
4	2
9	3
6	2
5	0
7	4
5	6
4	0
5	2
6	0
4	0
6	1
7	1
7	4
5	2
8	0
3	0
4	5
7	2
7	6
7	0
0	1
4	2
8	2
9	4
7	0
8	3
4	2
9	0
8	3
6	0
3	2
5	2
1	0
3	1
7	0
6	2
8	0
9	0
3	3
5	0
7	0
3	3
3	2
0	1
7	1
6	2
6	1
8	5
9	6
6	1
9	4
5	2
7	1
9	1
4	0
8	0
7	4
7	5
5	7
2	0
5	0
7	0
9	0
7	0
6	3
1	0
5	0
5	0
7	0
4	0
5	3
4	3
7	1
6	3
	0
	3
	1
	6
	1
	1
	0
	0
	2
	1
	0
	1
	1
	0
	3
	1
	2
	0
	0
	0
	0
	1
	2
	6
	0
	3
	0
	4
	1
	0
	0
	3
	1
	4
	4
	1
	2
	6
	1
	0
	1
	2
	2
	0
	0
	3
	0
	2
	0
	2
	2
	1
	4
	2

## Sheet: Fig 5D
combination of triplicates
before	minimal medium
7	4
10	0
6	1
6	0
1	0
10	1
7	2
7	1
7	1
8	0
8	3
5	2
7	0
6	0
8	1
9	0
10	0
8	2
5	1
2	0
12	1
10	9
6	0
6	5
7	0
6	6
7	0
6	0
8	0
9	0
9	2
9	4
1	7
9	3
5	0
6	2
8	0
6	2
7	1
5	0
8	2
6	3
4	1
4	0
7	0
8	0
7	4
7	0
1	3
4	0
6	0
5	9
6	0
5	6
3	3
1	0
9	1
6	0
4	2
8	1
3	1
8	0
	0
	0
	3
	2
	2
	2
	1
	2
	0
	0
	0
	0
	1
	1
	2
	0
	0
	3
	1
	0
	0
	2
	0
	2
	1
	4
	3
	4
	2
	2
	0
	1
	2
	2
	2
	1
	0
	1
	1
	0
	0
	2
	2
	0
	5
	0
	1
	0
	4
	1
	1
	2
	0
	4
	3
	2
	1
	2
	4
	2
	1
	0
	3
	0
	1
	0
	1
	6
	8
	0
	0
	0
	2
	1
	3
	2
	2
	3
	3
	1
	1
	0
	0
	1
	1
	0
	1
	1
	0
	1
	2
	0
	1
	3
	1
	0
	0
	1
	2
	2
	2
	1
	2
	0
	0
	0
	0
	0
	1
	2
	0
	4
	0
	3
	1
	5
	1
	1
	1
	0
	0
	3
	4
	1
	0
	3
	2
	1
	4
	4
	9
	1
	0
	2
	1
	8
	4
	0
	1
	3
	1
	2
	3
	2
	4
	1
	0
	4
	1
	0
	1
	4

## Sheet: Fig 5E
Combination of triplicates:
0.2	Minimal medium	plus Yeast Extract
5	2	5
5	2	2
8	2	3
5	3	8
8	2	8
6	1	2
10	0	5
9	0	3
8	2	8
6	0	8
7	0	7
6	1	5
6	1	4
5	0	4
7	2	8
6	2	3
8	0	3
5	0	6
0	1	7
7	4	4
6	0	6
4	0	5
7	1	5
4	0	5
5	1	5
5	1	2
8	2	5
3	0	5
4	2	10
4	1	8
10	1	4
6	0	3
6	0	3
6	0	2
5	1	5
8	3	5
6	0	5
7	0	4
7	1	3
5	0	4
7	0	0
8	3	0
8	1	6
7	0	4
6	0	4
5	1	8
2	2	5
1	2	1
8	3	1
3	0	1
5	0	3
8	1	1
6	0	1
5	3	3
6	0	5
1	2	5
5	1	1
6	0	7
6	0	4
5	0	3
3	1	1
3	3	5
5	2	2
1	3	5
7	0	1
11	1	2
5	3
6	0
4	2
6	3
5	2
4	0
8	1
5	1
3	2
3	3
7	3
5	3
6	0
5	0
	0

[truncated: 1 more sheets: Fig 5H]
